# Supplementary material for: Oxide-assisted growth of scalable single-crystalline graphene with seamlessly stitched millimeter-sized domains on commercial copper foils
Source: Royal Society of Chemistry journal article supplement (doi:10.1039/c8ra00770e), 2018-01-01
Supplement: c8ra00770e1.pdf [file c8ra00770e1.pdf]

## Electronic Supplementary Information

### Oxide-assisted growth of scalable single-crystalline graphene with seamlessly stitched millimeter-sized domains on commercial copper foils

*Yang Wang, Yu Cheng, Yunlu Wang, Shuai Zhang, Xuwei Zhang, Shaoqian Yin, Miao Wang,  
Yang Xia, Qunyang Li, Pei Zhao, Hongtao Wang*

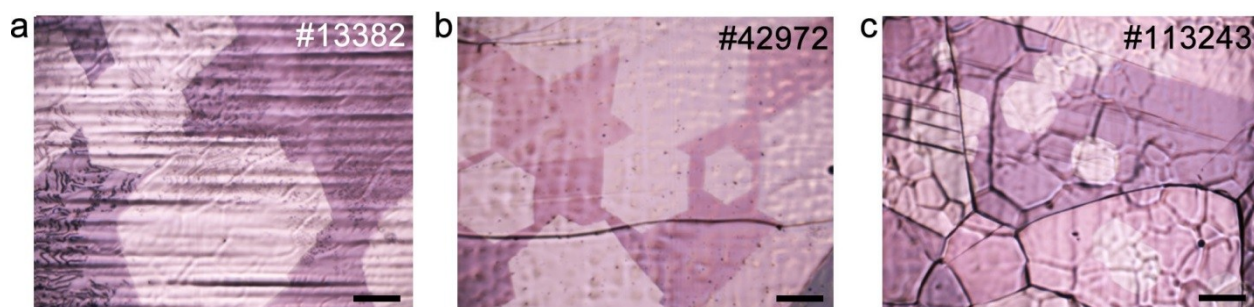

**Fig. S1.** Growth of aHGDs on different types of commercial Cu foils using oxide-assisted surface monocrystallization. Cu foil product numbers: #13382 and #42972 from Alfa Aesar China Chemical Co., Ltd., #113243 from Nilaco Co., Ltd. All scale bars: 200  $\mu\text{m}$ .

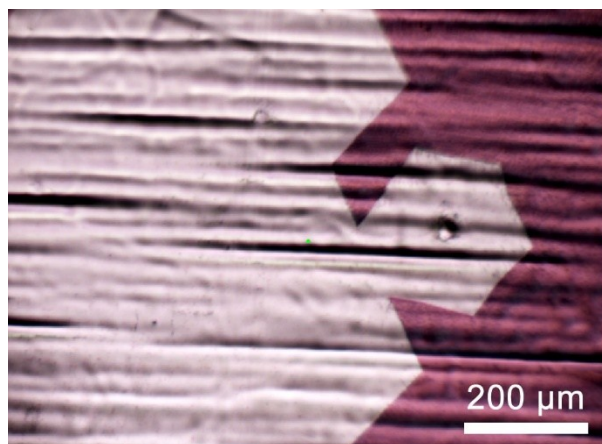

**Fig. S2.** Growth of aHGDs with prolonged annealing process by H<sub>2</sub>. The results show that the alignment of graphene domains does not change by the H<sub>2</sub> annealing, indicating that the surface monocrystallization maintains even with the H<sub>2</sub> annealing process.

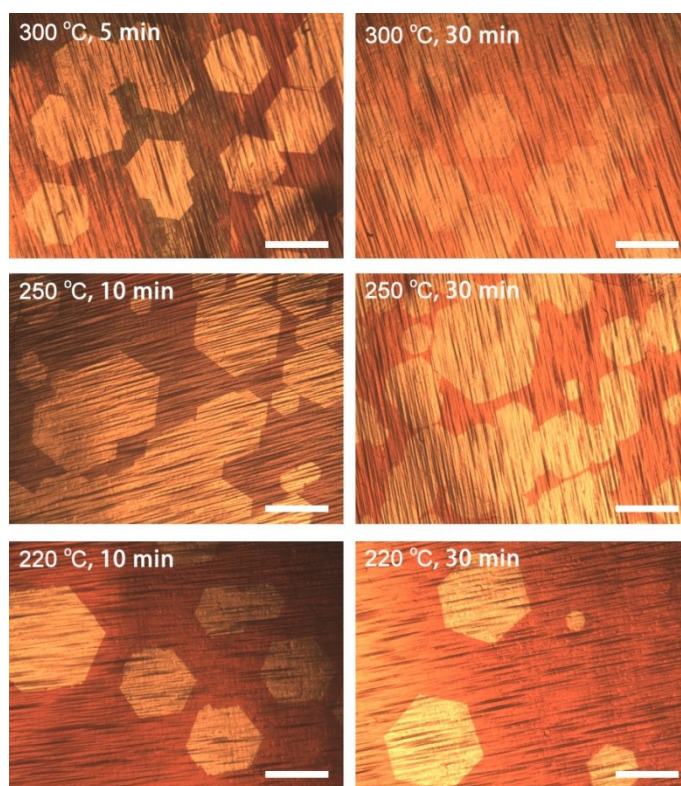

**Fig. S3.** Growth of aHGDs with different pre-oxidation temperature and time. All the growth periods in the experiments are the same as 30 min. All scale bars: 0.5 mm.

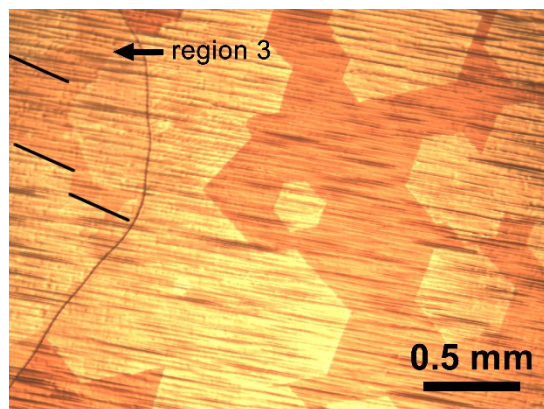

**Fig. S4.** Enlarged OM image in region 3 for Figure 2b for domain sizes and orientations.

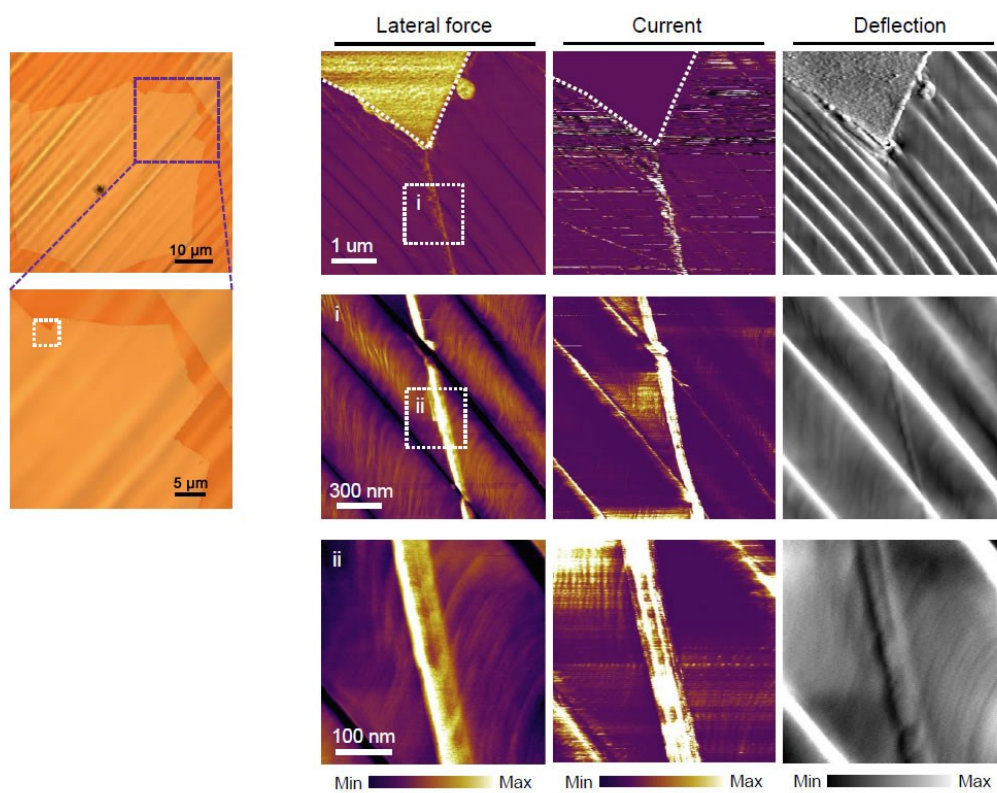

**Fig. S5.** The AFM lateral force, current and deflection measurements on the coalescence interface of two misoriented domains. Clear enhanced signals were observed in all the images.

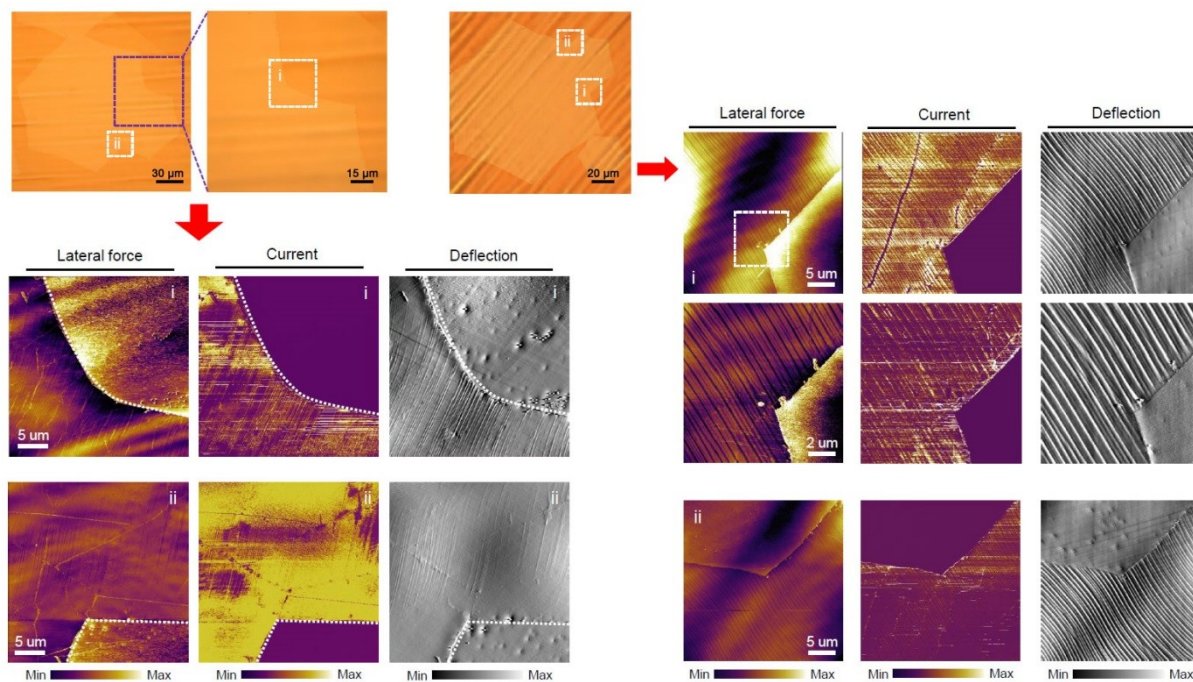

**Fig. S6.** The AFM lateral force, current and deflection measurements on the coalescence interfaces of different aHGds.

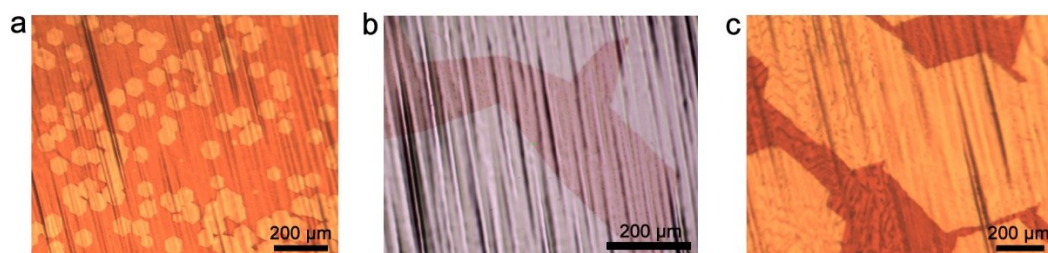

**Fig. S7.** Control experiments for the investigation of role of surface oxide layer in the growth of aHGds. The experimental condition and results are also summarized in Table S1.

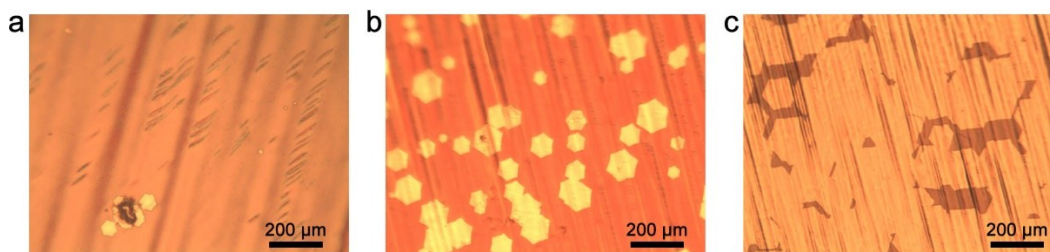

**Fig. S8.** CVD aHGD growth results with different periods of (a) 5 min, (b) 10 min, and (c) 15 min.

**Table S1. Conditions and results for control experiments in Fig. S7**

| Exp.        | Surface oxide | Heat and Anneal           | Growth (40 min)                    | Alignment | Domain size |
|-------------|---------------|---------------------------|------------------------------------|-----------|-------------|
| 1           | No            | Ar/H <sub>2</sub>         | Ar/H <sub>2</sub> /CH <sub>4</sub> | No        | Small       |
| 2           | Yes           | Ar/H <sub>2</sub>         | Ar/H <sub>2</sub> /CH <sub>4</sub> | No        | Large       |
| 3           | Yes           | Ar then Ar/H <sub>2</sub> | Ar/H <sub>2</sub> /CH <sub>4</sub> | Yes       | Large       |
| 4 (general) | Yes           | Ar                        | Ar/H <sub>2</sub> /CH <sub>4</sub> | Yes       | Large       |
